# Supplementary material for: Colorimetric aptasensor based on peroxidase-mimetic metal–organic framework nanoparticles and magnetic carbon dots for visual detection of Staphylococcus aureus
Source: Royal Society of Chemistry journal article supplement (doi:10.1039/d4ay01044b), 2024-01-01
Supplement: d4ay01044b1.pdf [file d4ay01044b1.pdf]

## Supplementary Information

### **Colorimetric aptasensor for visual detection of Staphylococcus aureus based on peroxidase-mimetic metal- organic framework nanoparticles and magnetic carbon dots**

Shanglin Li<sup>a</sup>, Zhaomeng Sun<sup>a</sup>, Ziyang He<sup>a</sup>, Mei Liu<sup>a\*</sup>

<sup>a</sup> Key Laboratory of Analytical Chemistry for Life Science of Shaanxi Province,  
College of Food Engineering and Nutritional Science, Shaanxi Normal University,  
Xi'an 710119, China

\*Corresponding author

Phone: 86-29-85310517, Fax: 86-29-85310517

E-mail: [liumei@snnu.edu.cn](mailto:liumei@snnu.edu.cn)

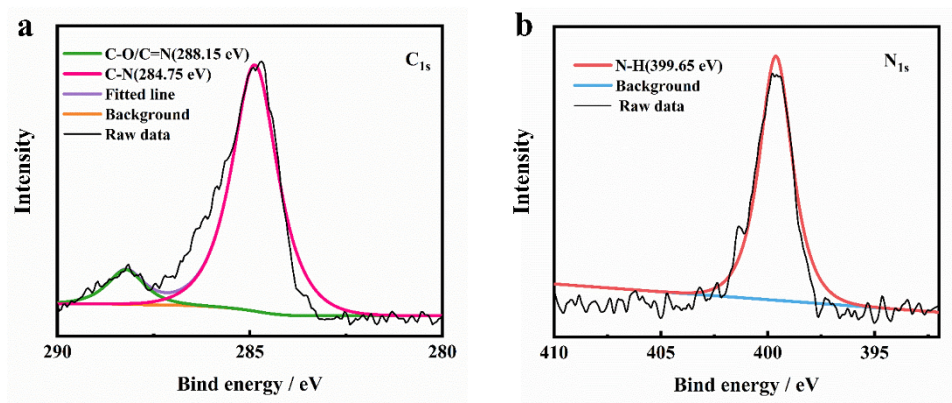

**Fig. S1** XPS spectra of Cu-MOFs: (a) HR Spectra of C<sub>1s</sub>; (b) HR Spectra of N<sub>1s</sub>

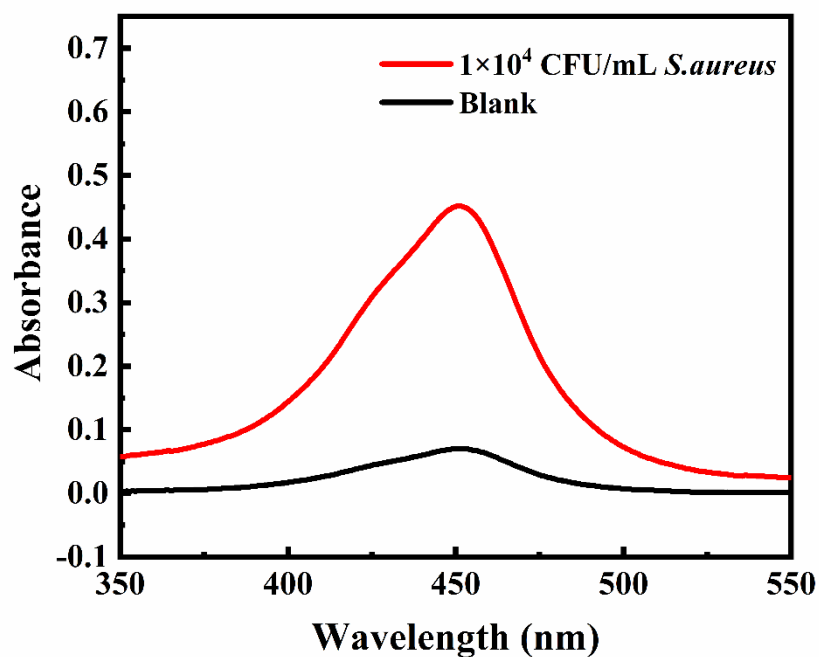

**Fig. S2** UV-Vis absorption spectrum of the TMB, H<sub>2</sub>O<sub>2</sub> reaction system by the blank control sample without *S. aureus* and the negative control sample with 1 × 10<sup>4</sup> CFU/mL *S. aureus*

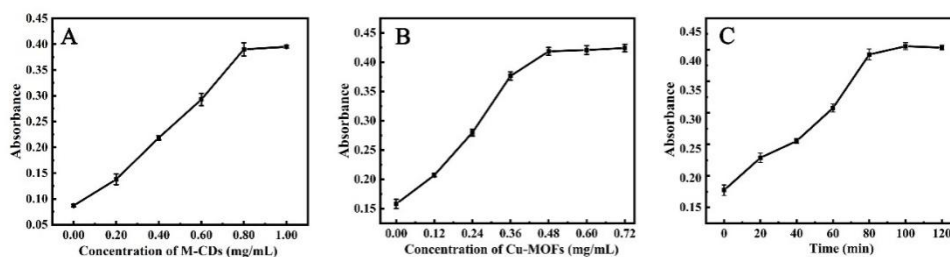

**Fig. S3** The effects of (a) concentration of M-CDs and (b) concentration of Cu-MOFs and (c) reaction time on absorbance of detection system

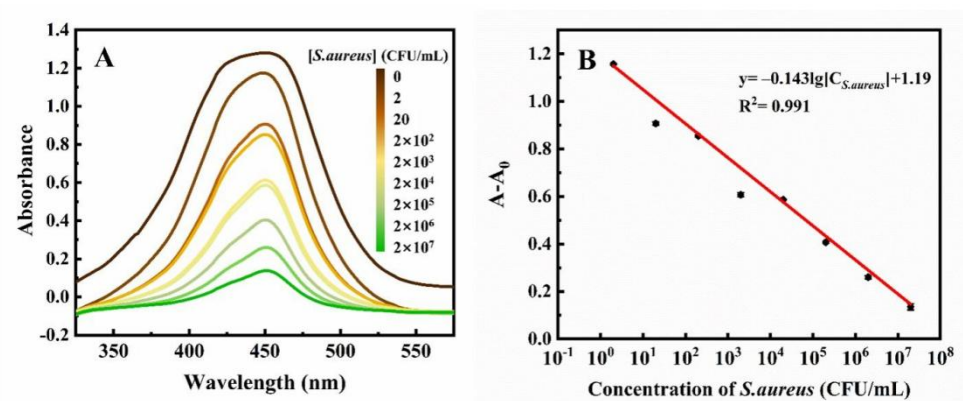

**Fig. S4** (a) UV-Vis absorption spectrum of the reaction systems catalyzed by supernatant with different concentrations of *S. aureus*; (b) linear relationship between
